# Supplementary material for: Design of iron atom modified thiophene-linked metalloporphyrin 2D conjugated microporous polymer as CO2 reduction photocatalyst
Source: Royal Society of Chemistry journal article supplement (doi:10.1039/c8cp00974k), 2018-01-01
Supplement: c8cp00974k1.pdf [file c8cp00974k1.pdf]

## Supplementary Information

### Design of Iron Atom Modified Thiophene-Linked Metalloporphyrin 2D Conjugated Microporous Polymer as CO<sub>2</sub> Reduction Photocatalyst

*Chongyang Chen, Chao Tang, Weiwei Xu, Youyong Li and Lai Xu\**

Institute of Functional Nano & Soft Materials (FUNSOM), Jiangsu Key Laboratory  
for Carbon-Based Functional Materials & Devices, Soochow University, 199 Ren'ai  
Road, Suzhou, Jiangsu 215123, PR China

Email: xulai15@suda.edu.cn

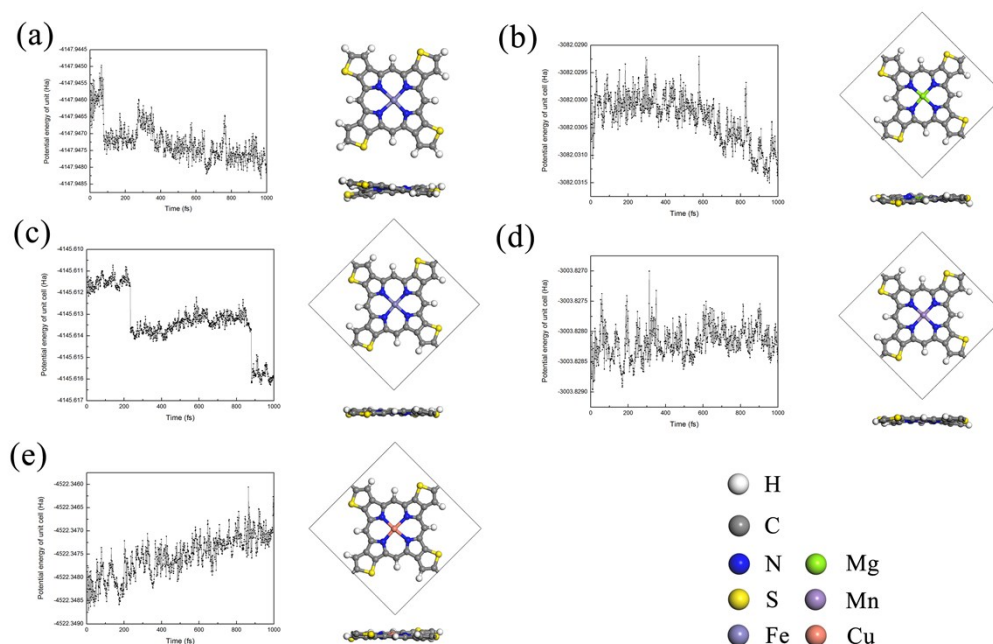

**Fig. S1** Diagram and structures of molecular dynamic (MD) calculations at 300 K with 1 ps: (a) Fe modified thiophene-linked porphin (TP) unit; (b) Mg modified thiophene-linked metalloporphyrin (TMP) unit cell; (c) Fe-TMP unit cell; (d) Mn-TMP unit cell; (e) Cu-TMP unit cell.

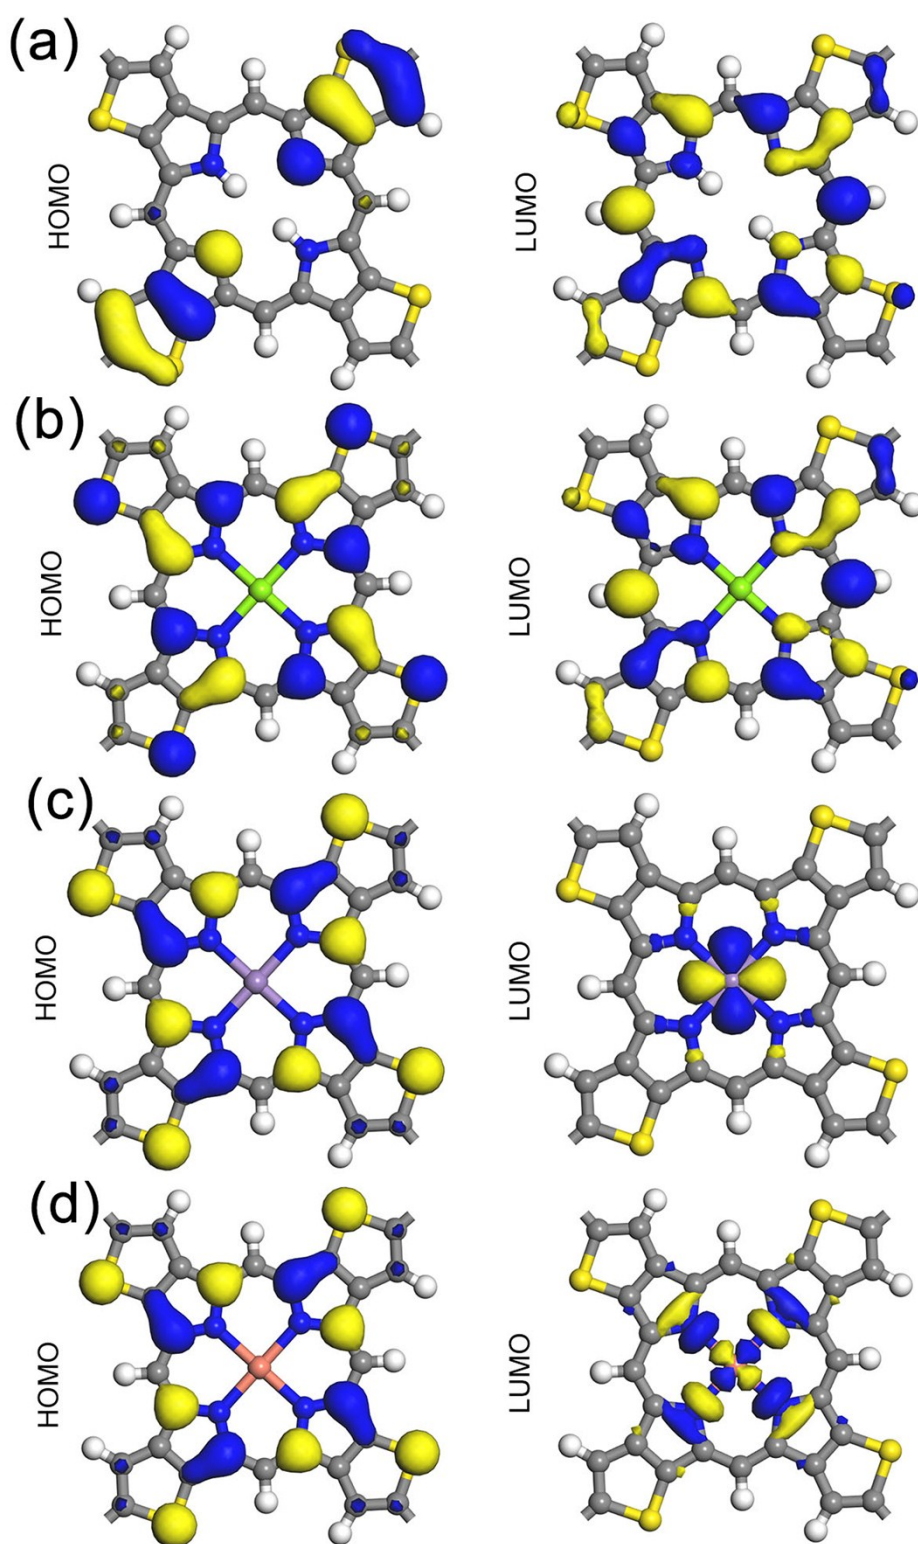

**Fig. S2** The HOMO and LUMO of pure CMP (a), Mg-CMP (b), Mn-CMP (c) and Cu-CMP (d) with an isosurface of  $0.03 \text{ e } \text{\AA}^{-3}$ .

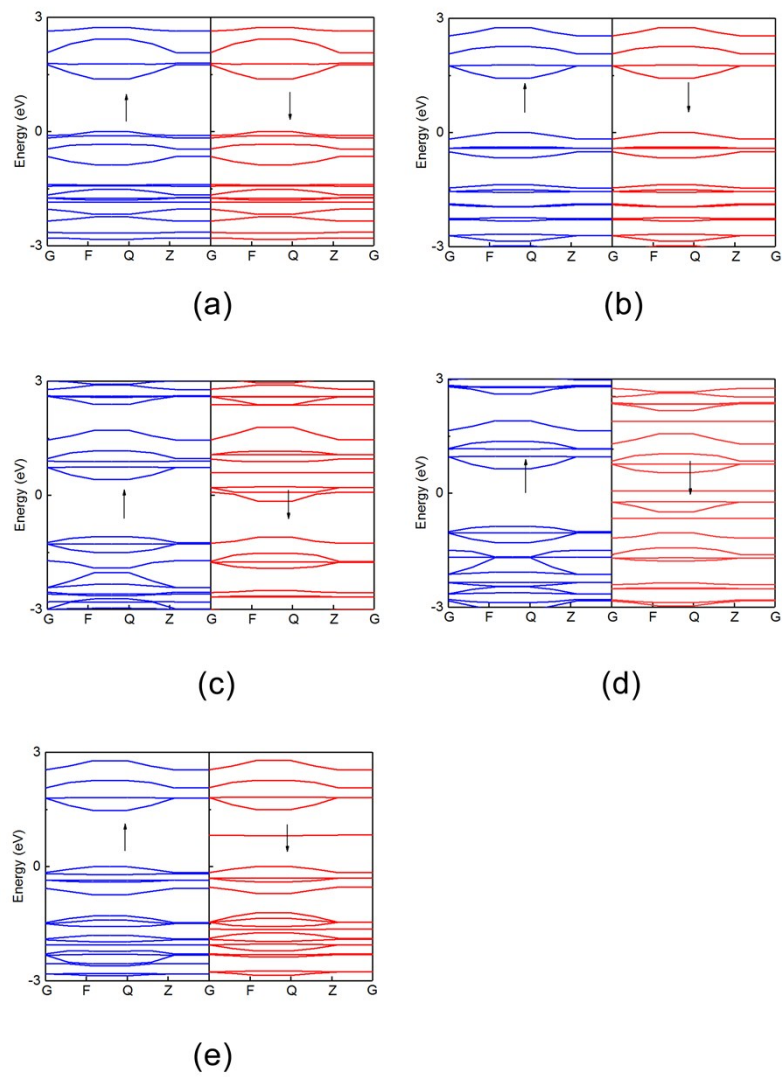

**Fig. S3** The calculated band structures of TP or various metal modified TMP unit cell: (a) pure TP; (b) Mg-TMP; (c) Mn-TMP; (d) Fe-TMP; (e) Cu-TMP. The fermi level was set to zero.

**Table S1.** Fermi level, valance band edge, conduction band edge position and band gap of various 2D monolayer slabs

|        | Fermi Level<br>Position (eV) | Valence Band Edge<br>Position (eV) | Conduction Band Edge<br>Position (eV) | Band Gap (eV) |
|--------|------------------------------|------------------------------------|---------------------------------------|---------------|
| Pure   | -4.34                        | -4.95                              | -3.72                                 | 1.22          |
| Mg-CMP | -4.04                        | -4.99                              | -3.65                                 | 1.34          |
| Mn-CMP | -4.07                        | —                                  | —                                     | —             |
| Fe-CMP | -4.30                        | —                                  | —                                     | —             |
| Cu-CMP | -4.50                        | -5.02                              | -4.25                                 | 0.77          |

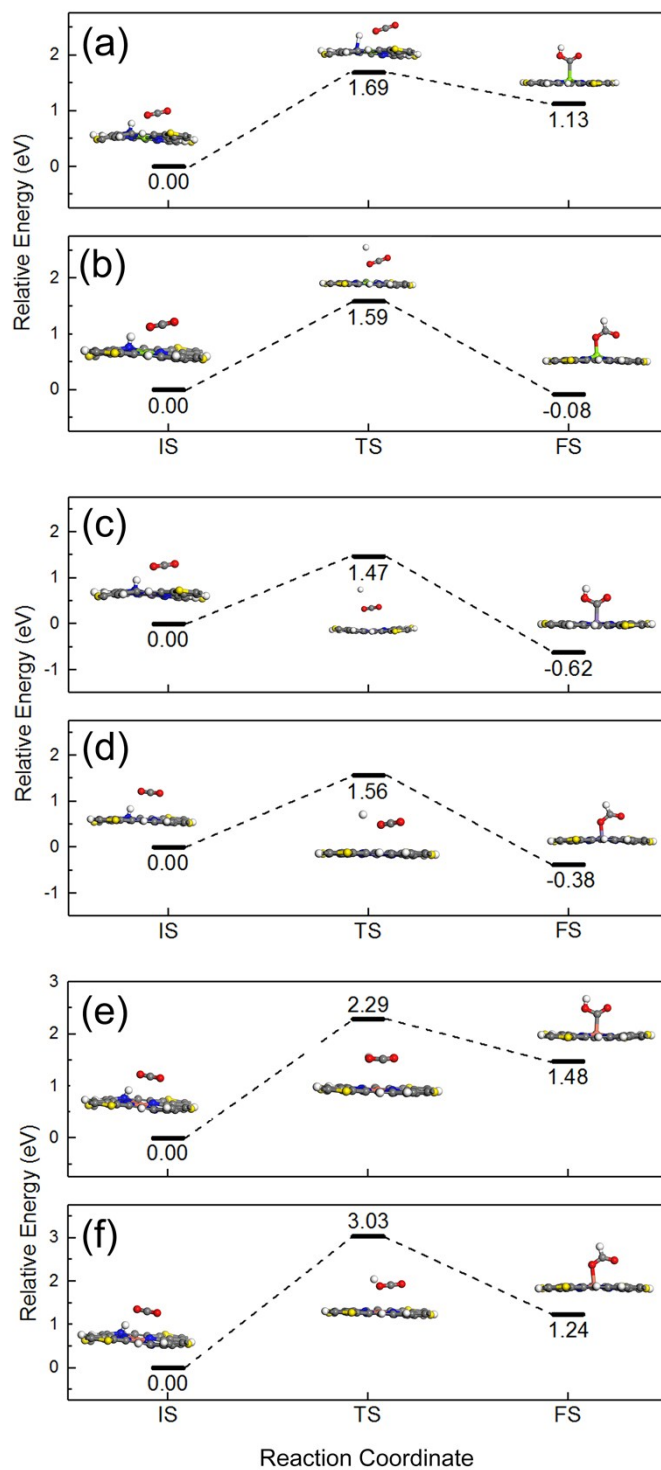

**Fig. S4** The optimized structures of the initial (IS), transition (TS), final (FS) states of the first reduction step and the corresponding activation barriers:  $\text{CO}_2^* + \text{H}^* \rightarrow$

COOH\* catalysed by Mg-CMP (a), Mn-CMP (c), and Cu-CMP (e);  $\text{CO}_2^* + \text{H}^* \rightarrow$   
HCOO\* catalysed by Mg-CMP (b), Mn-CMP (d), and Cu-CMP (f).
